# Supplementary material for: Insect eggs trigger systemic acquired resistance against a fungal and an oomycete pathogen
Source: PubMed Central journal article supplement — New Phytol. 2021 Sep 25;232(6):2491–505. doi: 10.1111/nph.17732 (PMC9292583; doi:10.1111/nph.17732), 2021-09-25
Supplement: NPH-232-2491-s001.pdf [file NPH-232-2491-s001.pdf]

## ***New Phytologist* Supporting Information**

Article title: Insect eggs trigger systemic acquired resistance against a fungal and an oomycete pathogen

Authors: Esteban Alfonso, Elia Stahl, Gaétan Glauser, Etienne Bellani, Tom M. Raaymakers, Guido Van den Ackerveken, Jürgen Zeier and Philippe Reymond

Article acceptance date: 05 September 2021

The following Supporting Information is available for this article:

**Fig. S1** EE treatment reduces *Botrytis cinerea* growth in distal leaves.

**Fig. S2** Time course of EE-induced reduction of *Botrytis cinerea* infection.

**Fig. S3** SA quantification in SA biosynthesis mutants.

**Fig. S4** Exogenous SA infiltration does not trigger EE-induced SAR.

**Fig. S5** Glucosinolates levels in EE- and *Botrytis cinerea*-treated plants.

**Fig. S6** ICA accumulates in response to *Botrytis cinerea* infection.

**Fig. S7** ICA conjugates accumulate in response to EE treatment.

**Fig. S8** EE induces camalexin accumulation in local leaves.

**Fig. S9** Early time course of camalexin accumulation.

**Fig. S10** Camalexin levels in various indolic mutants.

**Table S1** Replicate numbers and summary statistics (see separate file).

**Table S2** Time-course of single glucosinolate species accumulation.

**Table S3** Single glucosinolate species in Col-0 and *tmyb* mutant.

**Methods S1** Lines used in this study.

**Methods S2** Measurement of *Botrytis cinerea* growth by QPCR.

**Methods S3** Metabolite analyses.

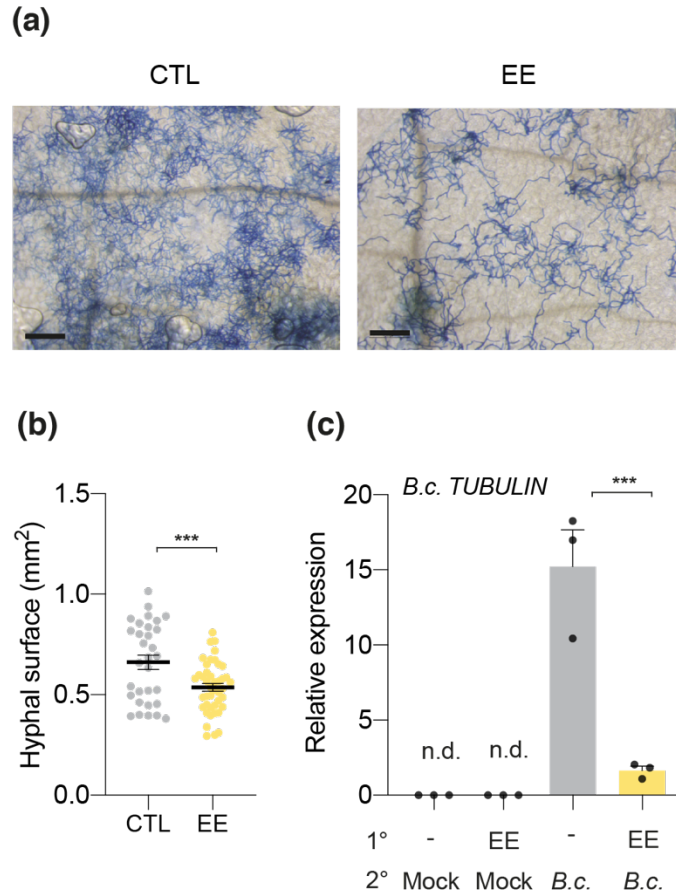

**Fig. S1** Egg extract treatment reduces *Botrytis cinerea* growth in distal leaves. (a) Photographs of stained hyphae on control plants (top) and plants pretreated with *Pieris brassicae* egg extract (EE) (bottom, distal leaf), 2 days post-inoculation. Scale bar: 200  $\mu$ m. (b) Plants were pretreated with EE and hyphal growth was measured 2 days after inoculation. Hyphae were stained by trypan blue and the surface of hyphae was quantified with ImageJ. Means  $\pm$  SE of three independent experiments are shown (n = 8-14 per experiment). Significant differences between control and treated plants are indicated (linear mixed model, \*\*\*  $P < 0.001$ ). (c) Expression of the *B. cinerea* tubulin gene in distal leaves. Local leaves (1°) were either treated with EE for 5 days or not treated (-). Distal leaves (2°) were then inoculated with PDB (Mock) or *B. cinerea* spore suspension (*B.c.*) for 2 days. Means  $\pm$  SE of three independent experiments are shown (n = 10-12 per experiment). Significant differences between control and treated plants are indicated (linear mixed model, \*\*\*  $P < 0.001$ . n.d. not determined).

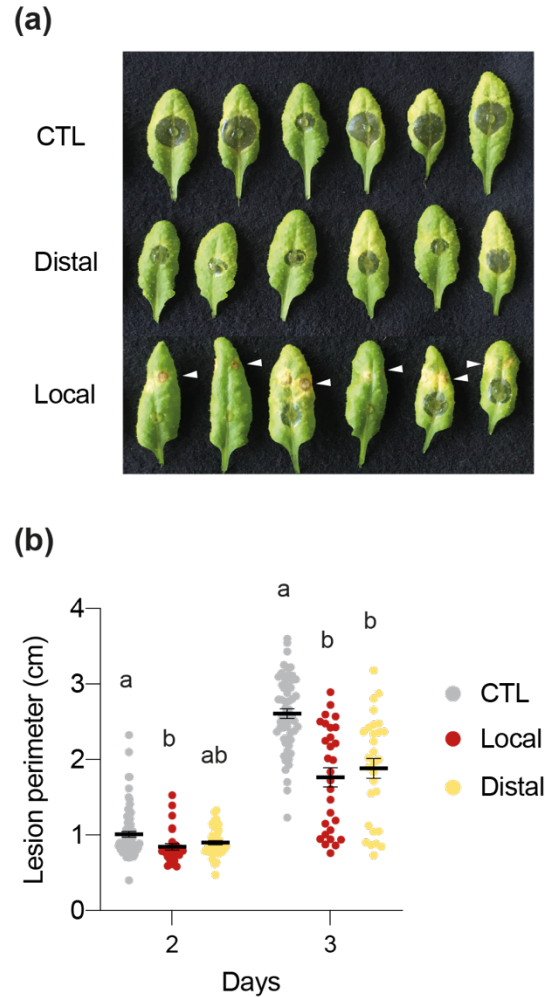

**Fig. S2** Time course of egg extract-induced reduction of *Botrytis cinerea* infection. (a) A solution of *B. cinerea* spores was deposited on untreated plants (CTL), on leaves distal to *Pieris brassicae* egg extract (EE)-treated leaves, or on EE-treated leaves. White arrows indicate the application site of the EE. Photographs were taken 3 days after infection. (b) Lesion perimeter measurement of control leaves, EE-treated leaves and leaves distal from EE-treated plants. Means  $\pm$  SE of three independent experiments are shown (n = 8-37 per experiment). For each time point, different letters indicate significant differences at  $P < 0.05$  (ANOVA followed by Tukey's Honest Significant Difference test). Dots indicate individual values.

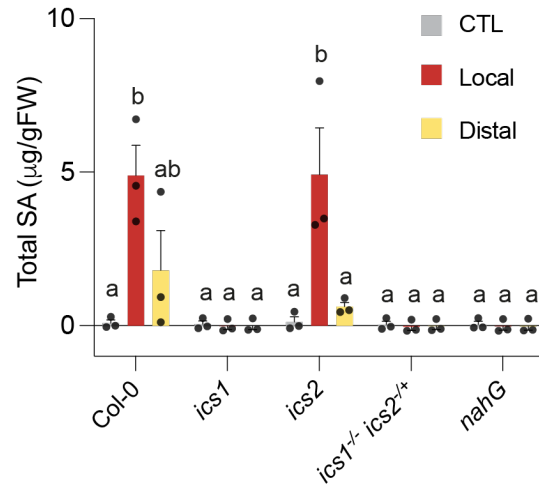

**Fig. S3** Salicylic acid (SA) quantification in SA biosynthesis mutants. Total SA was measured in untreated plants (CTL), *Pieris brassicae* egg extract (EE)-treated leaves (Local) and in leaves distal to EE-treated leaves (Distal) after 5 days. Means  $\pm$  SE of three independent experiments are shown (n = 6 per experiment). Different letters indicate significant difference between treatments within genotypes at  $P < 0.05$  (ANOVA followed by Tukey's Honest Significant Difference test).

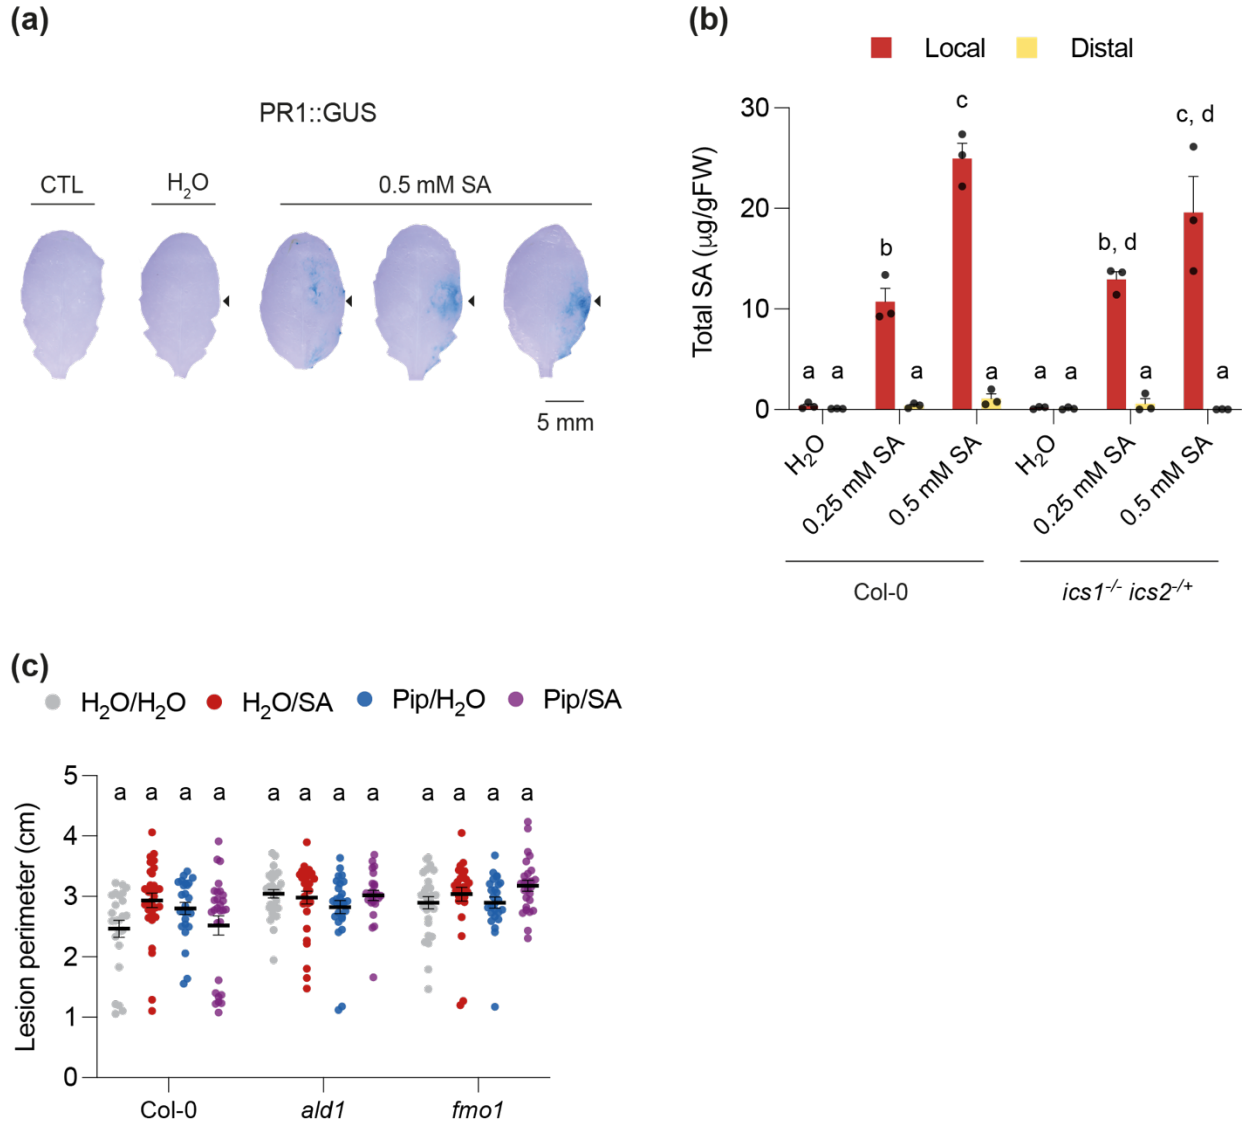

**Fig. S4** Exogenous salicylic acid (SA) infiltration does not trigger egg extract-induced systemic acquired resistance. (a). Infiltration of H<sub>2</sub>O and 0.5 mM SA in PR1::GUS reporter line. Black triangles indicate which half of the leaf was infiltrated. For SA infiltration, three representative images from different plants are shown. CTL, untreated. (b). Plant genotypes were infiltrated with H<sub>2</sub>O, 0.25 mM and 0.5 mM of SA in the abaxial surface of two leaves per plant for 4 h before SA quantification in local (infiltrated leaves) and distal leaves. Means ± SE of three independent experiments are shown (n = 6 per experiment). The double mutant *ics1 ics2* was homozygous for *ics1* (<sup>-/-</sup>) and heterozygous for *ics2* (<sup>+/-</sup>). For each genotype and location, different letters indicate significant differences between treatments in local leaves at *P*<0.05 (ANOVA followed by Tukey's Honest Significant Difference test) (c). H<sub>2</sub>O or 1 mM Pip solution was applied to the soil 24 h prior infection with *Botrytis cinerea* for 3 days. H<sub>2</sub>O or 0.25 mM SA were infiltrated in two leaves per plant 4 h prior infection. Means ± SE of three independent experiments are shown (n = 6-12 per experiment). For each genotype, different letters indicate significant differences at *P*<0.05 (ANOVA followed by Tukey's Honest Significant Difference test). Dots indicate individual values.

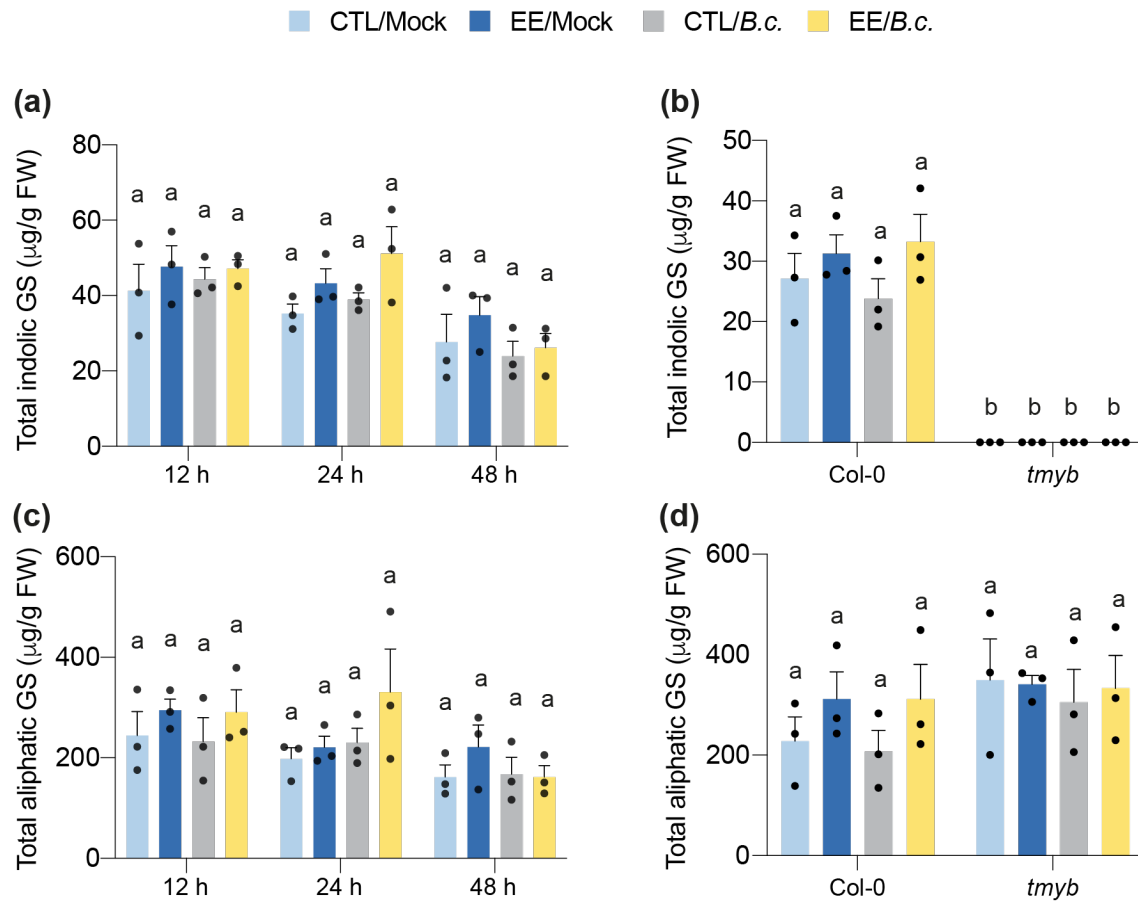

**Fig. S5** Glucosinolates levels in egg extract- and *Botrytis cinerea*-treated plants. Levels of indolic glucosinolates (a,b) and aliphatic glucosinolates (c,d) were quantified in distal leaves from 12 h to 48 h after *B. cinerea* infection in Col-0 (a,c) or after 24 h in Col-0 and *tmyb* (b,d). Local leaves were pretreated with *Pieris brassicae* egg extract (EE) for 5 days or left untreated (CTL) and then distal leaves were infected with *B. cinerea* (*B.c.*) or a mock solution (Mock). Means  $\pm$  SE of three independent experiments are shown ( $n = 10-12$  per experiment). For each time point (a,c) or between genotypes (b,d), different letters indicate significant differences at  $P < 0.05$  (ANOVA followed by Tukey's Honest Significant Difference test). *tmyb* = *myb34 myb51 myb122*.

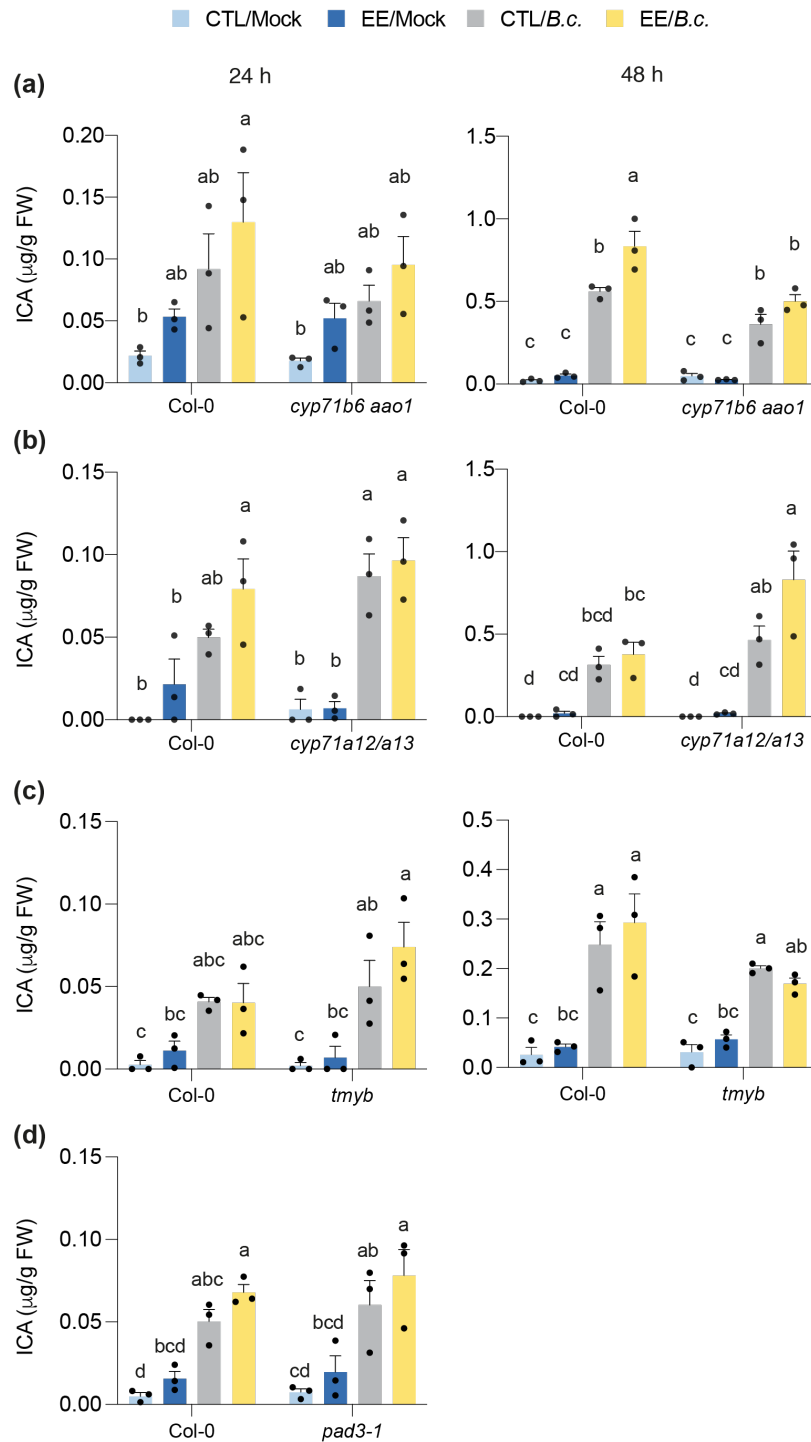

**Fig. S6** Indole carboxylic acid (ICA) accumulates in response to *Botrytis cinerea* infection. (a-d) Levels of ICA were quantified in distal leaves from 24 h and 48 h after *B. cinerea* infection. Local leaves were pretreated with *Pieris brassicae* egg extract (EE) for 5 days or left untreated (CTL) and then distal leaves were infected with *B. cinerea* (*B.c.*) or a mock solution (Mock). Means  $\pm$  SE of three independent experiments are shown ( $n = 10-12$  per experiment). Different letters indicate significant differences at  $P < 0.05$  (ANOVA followed by Tukey's Honest Significant Difference test). *tmyb* = *myb34 myb51 myb122*.

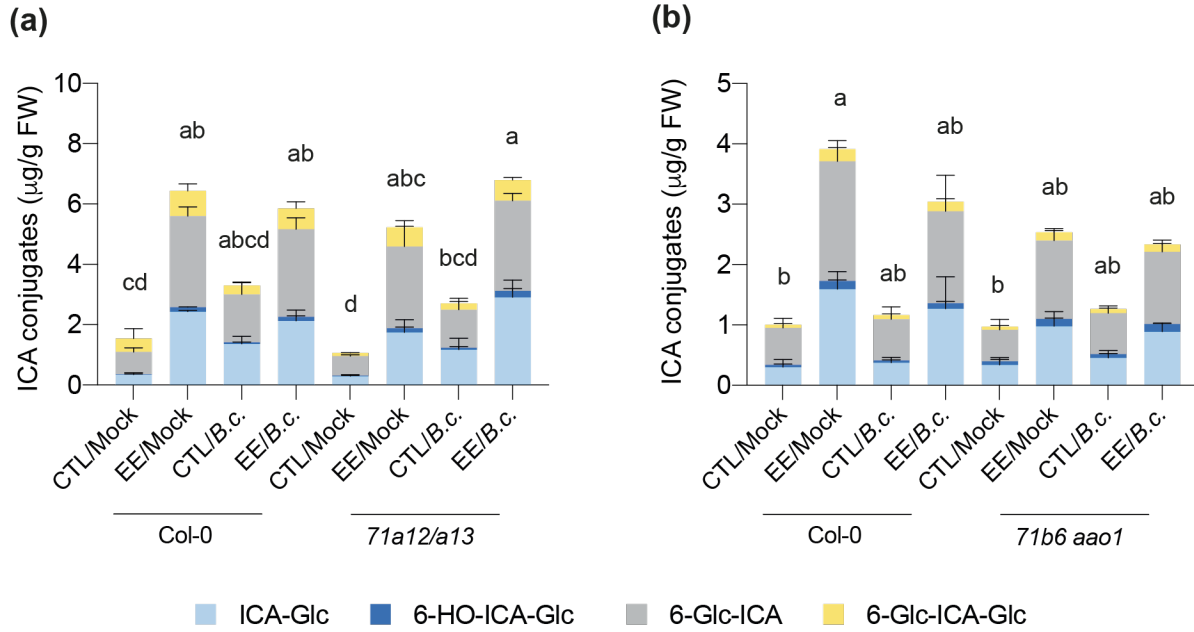

**Fig. S7** Indole carboxylic acid (ICA) conjugates accumulate in response to egg extract treatment. (a,b) Levels of ICA conjugates were quantified in distal leaves 48 h after *Botrytis cinerea* infection. Local leaves were pretreated with *Pieris brassicae* egg extract (EE) for 5 days or left untreated (CTL) and then distal leaves were infected with *B. cinerea* (*B.c.*) or a mock solution (Mock). Means  $\pm$  SE of three independent experiments are shown (n = 10-12 per experiment). Different letters indicate significant differences at  $P < 0.05$  (ANOVA followed by Tukey's Honest Significant Difference test).



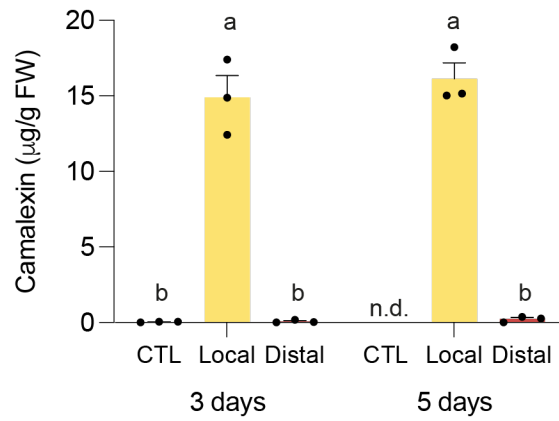

**Fig. S8** Egg extract induces camalexin accumulation in local leaves. Levels of camalexin were quantified in local and distal leaves 3 and 5 days after *Pieris brassicae* egg extract treatment. Control (CTL) leaves were untreated. Means  $\pm$  SE of three independent experiments are shown (n = 10-12 per experiment). Different letters indicate significant differences at  $P < 0.05$  (ANOVA followed by Tukey's Honest Significant Difference test). n.d., not determined.

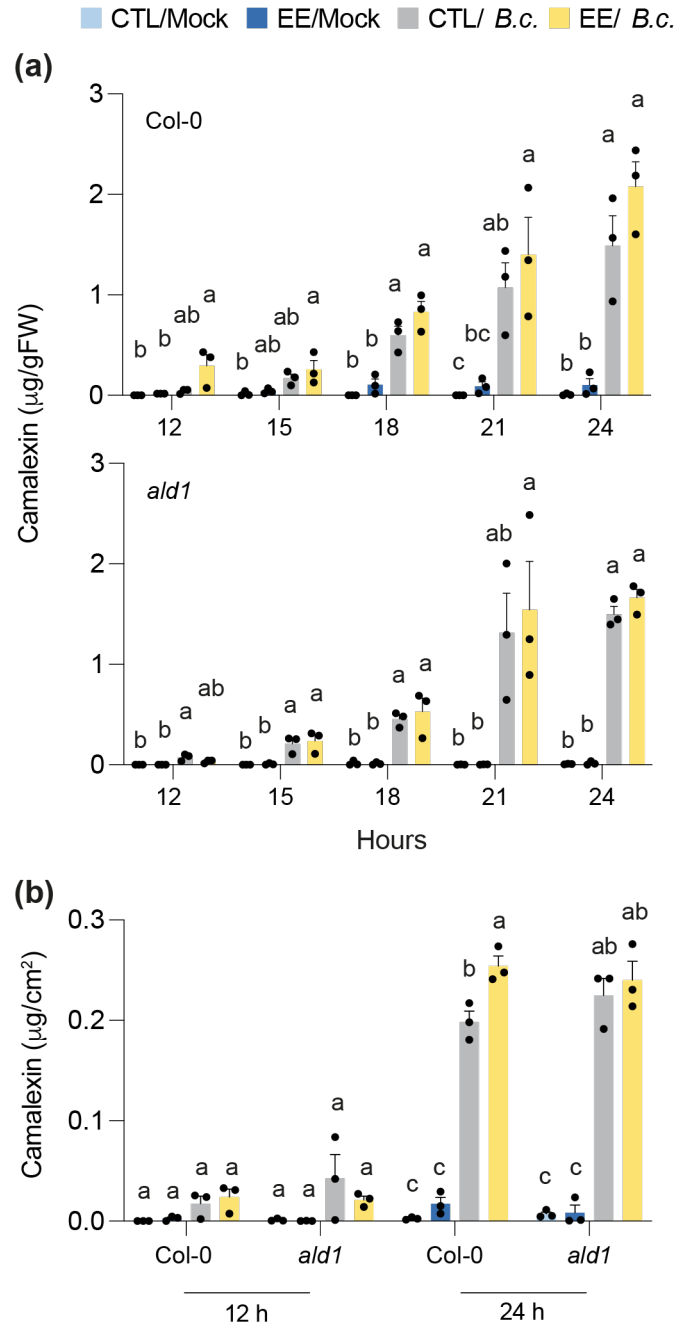

**Fig. S9** Early time course of camalexin accumulation. Levels of camalexin were quantified in distal leaves from 12 h to 24 h after *Botrytis cinerea* infection. Local leaves were pretreated with *Pieris brassicae* egg extract (EE) for 5 days or left untreated (CTL) and then distal leaves were infected with *B. cinerea* (*B.c.*) or a mock solution (Mock). (a) Total and (b) leaf surface camalexin was analyzed. Means  $\pm$  SE of three independent experiments are shown (n = 8-12 per experiment). For each time point, different letters indicate significant differences at  $P < 0.05$  (ANOVA followed by Tukey's Honest Significant Difference test).

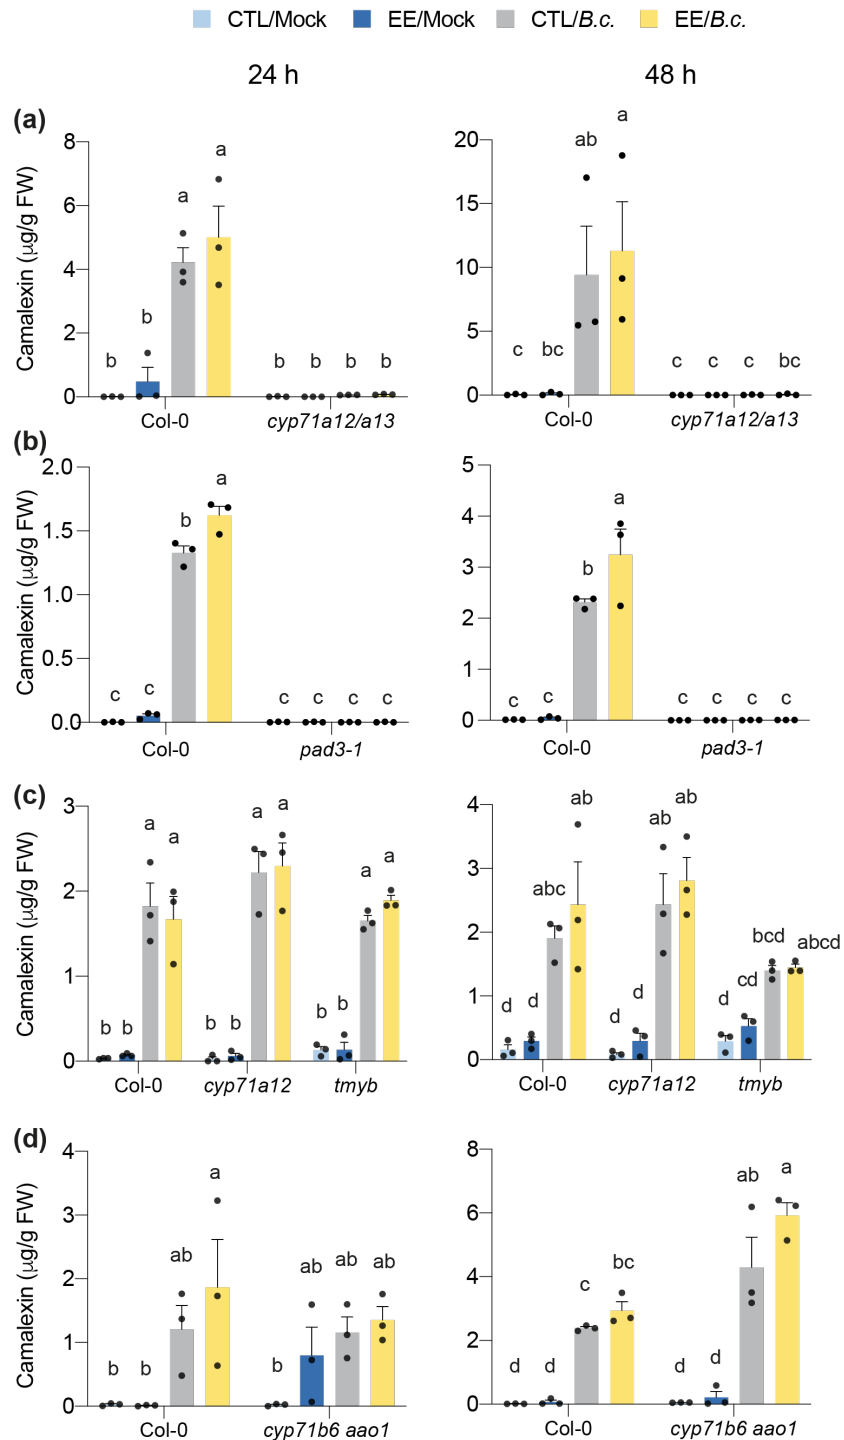

**Fig. S10** Camalexin levels in various indolic mutants. (a-d) Levels of camalexin were quantified in distal leaves from 24 h and 48 h after *Botrytis cinerea* infection. Local leaves were pretreated with *Pieris brassicae* egg extract (EE) for 5 days or left untreated (CTL) and then distal leaves were infected with *B. cinerea* (*B.c.*) or a mock solution (Mock). Means  $\pm$  SE of three independent experiments are shown (n = 10-12 per experiment). Different letters indicate significant differences at  $P < 0.05$  (ANOVA followed by Tukey's Honest Significant Difference test). *tmyb* = *myb34 myb51 myb122*.

**Table S2** Time-course of single glucosinolate species accumulation.

| Metabolite                         | Abb.   | Col-0 12 h    |               |                  |                 |
|------------------------------------|--------|---------------|---------------|------------------|-----------------|
|                                    |        | CTL/Mock      | EE/Mock       | CTL/ <i>B.c.</i> | EE/ <i>B.c.</i> |
| Glucosinolate <sup>1</sup>         | 3MSOP  | 20.55 ± 4.33  | 25.25 ± 2.00  | 21.22 ± 3.20     | 26.41 ± 2.63    |
| Glucoraphanin <sup>1</sup>         | 4MSOB  | 141.15 ± 33.5 | 173.7 ± 16.9  | 135.29 ± 30.2    | 175.69 ± 30.6   |
| Glucosinolate <sup>1</sup>         | 5MSOP  | 4.76 ± 0.99   | 5.65 ± 0.64   | 4.29 ± 0.83      | 5.8 ± 0.95      |
| Glucosinolate <sup>1</sup>         | 7MSOH  | 2.8 ± 0.77    | 3.18 ± 0.38   | 2.23 ± 0.33      | 3.3 ± 0.57      |
| Glucosinolate <sup>1</sup>         | 4MTB   | 75.3 ± 8.89   | 86.91 ± 2.98  | 69.15 ± 13.3     | 79.34 ± 10.1    |
| Glucobrassicin <sup>2</sup>        | I3M    | 32.05 ± 5.97  | 35.93 ± 4.73  | 34.47 ± 2.37     | 35.26 ± 1.64    |
| Hydroxyglucobrassicin <sup>2</sup> | OH-I3M | 3.95 ± 0.64   | 4.47 ± 0.52   | 4.24 ± 0.32      | 4.53 ± 0.17     |
| Methoxyglucobrassicin <sup>2</sup> | 4MOI3M | 4.75 ± 0.44   | 6.57 ± 0.42   | 5.13 ± 0.35      | 6.7 ± 0.61      |
| Neoglucobrassicin <sup>2</sup>     | 1MOI3M | 0.57 ± 0.06   | 0.69 ± 0.05   | 0.52 ± 0.05      | 0.66 ± 0.04     |
| Col-0 24 h                         |        |               |               |                  |                 |
|                                    |        | CTL/Mock      | EE/Mock       | CTL/ <i>B.c.</i> | EE/ <i>B.c.</i> |
| Glucosinolate <sup>1</sup>         | 3MSOP  | 17.81 ± 2.38  | 23.29 ± 3.04  | 21.41 ± 3.47     | 28.38 ± 7.21    |
| Glucoraphanin <sup>1</sup>         | 4MSOB  | 121.09 ± 13.3 | 126.85 ± 14.1 | 136.67 ± 19.6    | 199.84 ± 58.6   |
| Glucosinolate <sup>1</sup>         | 5MSOP  | 4.12 ± 0.41   | 4.99 ± 0.66   | 4.58 ± 0.28      | 7.04 ± 1.39     |
| Glucosinolate <sup>1</sup>         | 7MSOH  | 2.41 ± 0.25   | 2.77 ± 0.23   | 2.59 ± 0.19      | 4.34 ± 0.75     |
| Glucosinolate <sup>1</sup>         | 4MTB   | 52.42 ± 6.00  | 63.03 ± 11.6  | 64.97 ± 5.63     | 91.19 ± 20.6    |
| Glucobrassicin <sup>2</sup>        | I3M    | 26.02 ± 1.47  | 32.05 ± 2.81  | 28.5 ± 1.31      | 36.58 ± 5.25    |
| Hydroxyglucobrassicin <sup>2</sup> | OH-I3M | 3.23 ± 0.26   | 4 ± 0.40      | 3.57 ± 0.16      | 4.82 ± 0.74     |
| Methoxyglucobrassicin <sup>2</sup> | 4MOI3M | 5.45 ± 0.73   | 6.61 ± 0.56   | 6.29 ± 0.33      | 8.95 ± 1.06     |
| Neoglucobrassicin <sup>2</sup>     | 1MOI3M | 0.53 ± 0.10   | 0.61 ± 0.13   | 0.6 ± 0.02       | 0.79 ± 0.13     |
| Col-0 48 h                         |        |               |               |                  |                 |
|                                    |        | CTL/Mock      | EE/Mock       | CTL/ <i>B.c.</i> | EE/ <i>B.c.</i> |
| Glucosinolate <sup>1</sup>         | 3MSOP  | 15.16 ± 2.25  | 19.87 ± 3.31  | 14.93 ± 2.86     | 15.09 ± 1.42    |
| Glucoraphanin <sup>1</sup>         | 4MSOB  | 92.95 ± 15.1  | 126.81 ± 23.9 | 90.99 ± 14.5     | 90.08 ± 9.98    |
| Glucosinolate <sup>1</sup>         | 5MSOP  | 3.42 ± 0.62   | 4.49 ± 0.60   | 3.32 ± 0.59      | 3.46 ± 0.32     |
| Glucosinolate <sup>1</sup>         | 7MSOH  | 2.2 ± 0.33    | 2.77 ± 0.50   | 1.81 ± 0.31      | 2.05 ± 0.25     |
| Glucosinolate <sup>1</sup>         | 4MTB   | 48.18 ± 6.95  | 67.64 ± 15.9  | 56.15 ± 16.5     | 51.3 ± 10.9     |
| Glucobrassicin <sup>2</sup>        | I3M    | 19.18 ± 5.96  | 24.28 ± 3.94  | 14.82 ± 2.65     | 15.71 ± 3.02    |
| Hydroxyglucobrassicin <sup>2</sup> | OH-I3M | 2.35 ± 0.68   | 3.13 ± 0.49   | 1.92 ± 0.35      | 2.13 ± 0.39     |
| Methoxyglucobrassicin <sup>2</sup> | 4MOI3M | 5.64 ± 0.63   | 6.76 ± 0.49   | 6.33 ± 0.86      | 7.1 ± 0.30      |
| Neoglucobrassicin <sup>2</sup>     | 1MOI3M | 0.53 ± 0.13   | 0.66 ± 0.13   | 0.86 ± 0.10      | 1.18 ± 0.34     |

Levels of single aliphatic<sup>1</sup> and indole<sup>2</sup> glucosinolate species in µg/g FW, quantified in distal leaves from 12 h to 48 h after *Botrytis cinerea* (*B.c.*) infection or treatment with a mock solution (Mock) in Col-0, with or without pretreatment for 5 days with *Pieris brassicae* egg extract (EE). Means ± SE of three independent experiments are shown (n = 10-12 leaves per sample/experiment). Total aliphatic and indole glucosinolates are shown in Fig. S5a and c. Abb. = Abbreviation.

**Table S3** Single glucosinolate species in Col-0 and *tmyb* mutant.

| Metabolite                         | Abb.   | Col-0    |        |         |        |                  |        |                 |        |
|------------------------------------|--------|----------|--------|---------|--------|------------------|--------|-----------------|--------|
|                                    |        | CTL/Mock |        | EE/Mock |        | CTL/ <i>B.c.</i> |        | EE/ <i>B.c.</i> |        |
| Glucoiberin <sup>1</sup>           | 3MSOP  | 16.97    | ± 3.59 | 22.28   | ± 3.07 | 16.25            | ± 3.30 | 22.93           | ± 4.42 |
| Glucoraphanin <sup>1</sup>         | 4MSOB  | 114.18   | ± 23.3 | 165.43  | ± 29.8 | 107.13           | ± 22.2 | 170.10          | ± 39.6 |
| Glucoalyssin <sup>1</sup>          | 5MSOP  | 3.17     | ± 0.63 | 4.04    | ± 0.54 | 3.01             | ± 0.59 | 4.29            | ± 0.81 |
| Glucoibarin <sup>1</sup>           | 7MSOH  | 1.32     | ± 0.54 | 1.71    | ± 0.40 | 1.08             | ± 0.37 | 1.66            | ± 0.52 |
| Glucohirsutin <sup>1</sup>         | 8MSOO  | 16.17    | ± 4.98 | 20.78   | ± 3.87 | 12.89            | ± 3.62 | 19.86           | ± 3.59 |
| Glucoerucin <sup>1</sup>           | 4MTB   | 40.12    | ± 7.84 | 56.9    | ± 11.9 | 36.08            | ± 8.08 | 52.58           | ± 14.4 |
| Glucoberteroin <sup>1</sup>        | 5MTB   | 3.47     | ± 0.64 | 4.29    | ± 0.57 | 3.11             | ± 0.66 | 4.31            | ± 1.02 |
| Gluconasturtiin <sup>1</sup>       | 2PE    | 0.64     | ± 0.18 | 0.88    | ± 0.24 | 0.59             | ± 0.16 | 0.85            | ± 0.29 |
| 7-Methylthioheptyl-GS <sup>1</sup> | 7MTH   | 7.19     | ± 1.73 | 7.72    | ± 1.07 | 6.48             | ± 1.19 | 7.74            | ± 1.84 |
| 8-Methylthiooctyl-GS <sup>1</sup>  | 8MTO   | 24.91    | ± 5.31 | 27.68   | ± 2.78 | 20.27            | ± 3.21 | 26.51           | ± 4.74 |
| Glucobrassicin <sup>2</sup>        | I3M    | 20.22    | ± 3.23 | 23.53   | ± 2.35 | 18.11            | ± 2.59 | 25.54           | ± 3.55 |
| Hydroxyglucobrassicin <sup>2</sup> | OH-I3M | 2.3      | ± 0.40 | 2.85    | ± 0.35 | 2.32             | ± 0.42 | 3.38            | ± 0.74 |
| Methoxyglucobrassicin <sup>2</sup> | 4MOI3M | 4.62     | ± 0.58 | 4.88    | ± 0.61 | 3.37             | ± 0.27 | 4.3             | ± 0.33 |

  

| <i>tmyb</i>                        |        |          |        |         |       |                  |        |                 |        |
|------------------------------------|--------|----------|--------|---------|-------|------------------|--------|-----------------|--------|
|                                    | Abb.   |          |        |         |       |                  |        |                 |        |
|                                    |        | CTL/Mock |        | EE/Mock |       | CTL/ <i>B.c.</i> |        | EE/ <i>B.c.</i> |        |
| Glucoiberin <sup>1</sup>           | 3MSOP  | 25.40    | ± 4.21 | 25.64   | ± 1.9 | 23.01            | ± 3.80 | 24.47           | ± 4.54 |
| Glucoraphanin <sup>1</sup>         | 4MSOB  | 169.51   | ± 40.4 | 170.85  | ± 6.9 | 150.64           | ± 31.8 | 158.51          | ± 32.5 |
| Glucoalyssin <sup>1</sup>          | 5MSOP  | 4.58     | ± 0.55 | 4.42    | ± 0.6 | 4.13             | ± 0.62 | 4.38            | ± 0.81 |
| Glucoibarin <sup>1</sup>           | 7MSOH  | 2.43     | ± 0.75 | 2.24    | ± 0.2 | 2.06             | ± 0.74 | 2.36            | ± 0.73 |
| Glucohirsutin <sup>1</sup>         | 8MSOO  | 28.56    | ± 9.87 | 24.63   | ± 0.9 | 22.89            | ± 6.74 | 24.69           | ± 6.31 |
| Glucoerucin <sup>1</sup>           | 4MTB   | 70.87    | ± 21.8 | 69.56   | ± 3.3 | 62.64            | ± 16.9 | 75.05           | ± 15.8 |
| Glucoberteroin <sup>1</sup>        | 5MTB   | 4.92     | ± 0.66 | 5.08    | ± 0.4 | 4.3              | ± 0.57 | 4.86            | ± 0.78 |
| Gluconasturtiin <sup>1</sup>       | 2PE    | 1.09     | ± 0.27 | 1.09    | ± 0.2 | 0.99             | ± 0.28 | 1.16            | ± 0.24 |
| 7-Methylthioheptyl-GS <sup>1</sup> | 7MTH   | 10.91    | ± 1.12 | 9.94    | ± 1.7 | 9.37             | ± 1.34 | 10.2            | ± 2.18 |
| 8-Methylthiooctyl-GS <sup>1</sup>  | 8MTO   | 30.97    | ± 5.29 | 27.49   | ± 3.5 | 25.21            | ± 3.43 | 27.06           | ± 4.46 |
| Glucobrassicin <sup>2</sup>        | I3M    | n.d.     |        | n.d.    |       | n.d.             |        | n.d.            |        |
| Hydroxyglucobrassicin <sup>2</sup> | OH-I3M | n.d.     |        | n.d.    |       | n.d.             |        | n.d.            |        |
| Methoxyglucobrassicin <sup>2</sup> | 4MOI3M | n.d.     |        | n.d.    |       | n.d.             |        | n.d.            |        |

Levels of single aliphatic<sup>1</sup> and indole<sup>2</sup> glucosinolate species in µg/g FW, quantified in distal leaves 24 h after *Botrytis cinerea* infection or treatment with a mock solution (Mock) in Col-0 and *tmyb*, with or without pretreatment for 5 days with *Pieris brassicae* egg extract (EE). Means ± SE of three independent experiments are shown (n = 10-12 leaves per sample/experiment). Total aliphatic and indole glucosinolates are shown in Fig. S5b and d. Abb. = Abbreviation, n.d. = not detectable. *tmyb* = *myb34 myb51 myb122*.

## Methods S1 Lines used in this study.

Lines used in this study: *ald1* (Návarová *et al.*, 2012), *cyp71a12* (Millet *et al.*, 2010), *cyp71a12 cyp71a13* (Müller *et al.*, 2015), *cyp79b2 cyp79b3* (Zhao *et al.*, 2002), *cyp82c2-2* (Rajniak *et al.*, 2015), *fmo1* (Mishina & Zeier, 2006), *fox1* (Rajniak *et al.*, 2015), *ics1* (Nawrath & Métraux, 1999), *ics2* (Garcion *et al.*, 2008), *lecrk-1.8* (Gouhier-Darimont *et al.*, 2013), *myb28 myb29* (Beekwilder *et al.*, 2008), *myb34 myb51 myb122 (tmyb)* (Frerigmann & Gigolashvili, 2014), *nahG* (Nawrath & Métraux, 1999), *npr1-1* (Cao *et al.*, 1997), *npr1-1 npr4-4D* (Liu *et al.*, 2020), *pad3-1* (Glazebrook & Ausubel, 1994), *wrky33* (Birkenbihl *et al.*, 2012). All genotypes were in the Columbia (Col-0) background. The *cyp71b6 aao1* double mutant was obtained by crossing single mutants described previously, *cyp71b6* (GABI\_305A04) and *aao1* (SALK\_069221) (Müller *et al.*, 2019). Genotyping was done using the following primers: CYP71B6 (At2g24180) LP: 5'-CCAGGTGCTTCTTCAACACTC-3', RP: 5'-TCATCTGGATCTTCCGTTGAC-3'; AAO1 (At5g20960) LP: 5'-AGCAGCTCGAGTCAAGAACAG-3', RP: 5'-TGCAATATCTGCATGCTTTTG-3'. The *ics1<sup>-/-</sup> ics2<sup>+/-</sup>* double mutant (homozygous for *ics1*, heterozygous for *ics2*) was obtained by crossing *ics1* and *ics2*, and was genotyped using a CAPS marker for *ics1* (Heck *et al.*, 2003) and flanking primers for *ics2* T-DNA knockout (Garcion *et al.*, 2008). *ICS1* (At1g74710) Fw: 5'-GGA CTC AAT TAG GTG TCT GC-3', Rv: 5'-AAG CCT TGC TTC TTC TGC TG-3'; *ICS2* (At1g18870) Fw: 5'-GTC TTC AAA GTC TCC TCT GAT-3' Rv: 5'-TGA ATC ACC TCT AGG CCT TGT-3'.

## Methods S2 Measurement of *Botrytis cinerea* growth by QPCR.

Total RNA from a pool of 10-12 leaves was extracted using a ReliaPrep™ RNA Tissue Miniprep System (Promega). For cDNA synthesis, 500 ng of total RNA was reverse-transcribed using M-MLV reverse transcriptase (Invitrogen) in a final volume of 15.25 µl. Each cDNA sample was generated in triplicate and diluted eightfold with water. Quantitative real-time PCR analysis was performed in a final volume of 20 µl containing 2 µl of cDNA, 0.2 µM of each primer, 0.03 µM of reference dye and 10 µl of Brilliant III Ultra Fast SYBR Green qPCR Master Mix (Agilent). Reactions were performed using an Mx3000P real-time PCR machine (Agilent) with the following program: 95°C for 3 min, then 40 cycles of 10 sec at 95°C and 20 sec at 60°C. Relative mRNA abundance of *Bc Tubulin* was normalized to the housekeeping gene *PUX1* (Windram *et al.*, 2012). The following primers were used: *Bc Tub* (Broad MIT ID: BC1G\_00122) Fw: 5'-

TTCCATGAAGGAGGTTGAGG-3', Rv: 5'-TACCAACGAAGGTGGAGGAC-3'; PUX1  
(At3g27310) Fw: 5'-AATGTTGCCTCCAATGTGTGA-3', Rv: 5'-  
TTTTTACCGCCTTTTGGCTAC-3'.

### **Methods S3** Metabolite analyses.

For metabolite analyses, an Acquity UPLC system coupled to a Synapt G2 QTOF mass spectrometer (Waters, Milford, MA) was employed. The entire system was controlled by Masslynx 4.1. The separation was performed in gradient mode on an Acquity BEH C18 column, 50 x 2.1 mm, 1.7  $\mu$ m particle size (Waters) using a flow rate of 0.4 mL/min and mobile phases consisting of H<sub>2</sub>O + formic acid 0.05% (phase A) and acetonitrile + formic acid 0.05% (phase B). The gradient program started at 2% B, increased linearly to 60% B in 4.0 min, then to 100% B in 2.0 min, the column was then washed with 100% B for 2.0 min before re-equilibration at initial conditions (2% B) for 2.0 min. The column temperature was maintained at 25°C throughout the run. The injection volume was 2  $\mu$ L (partial loop with needle overfill mode). Mass spectrometric detection was performed in electrospray negative mode using a mass range of 50-600 Da. The MS capillary voltage was -2.0 kV, the cone voltage was -25V, the desolvation temperature and gas flow were 500°C and 800 L/h, respectively, the cone gas flow was 20 L/h, and the detector voltage was 2250 V. Accurate mass measurements were provided by infusing a 500 ng/mL solution of leucine-enkephalin through the LockSpray probe at a flow rate of 15  $\mu$ L/min. The quantification of ICA was achieved by external calibration using calibration points at 5, 20, 100, 500 and 2000 ng/mL.

For analysis of leaf surface camalexin, *Botrytis cinerea*-infected or mock-treated leaves were immersed in 80% MeOH (2 mL/ 2 leaves) in 6-well plates and gently rotated for 30 sec. The solvent was collected in Eppendorf tubes and evaporated using a speed vac. The pellet was resuspended in 200  $\mu$ l of 80% MeOH and transferred to vials for further LC-MS analysis. Quantification of camalexin was done according to (Balmer *et al.*, 2018). Values were normalized to the leaf surface and expressed as  $\mu$ g/cm<sup>2</sup>. A total of 8 leaves (2 leaves from 4 plants) was used for each biological replicate.

## References

- Balmer A, Pastor V, Glauser G, Mauch-Mani B. 2018.** Tricarboxylates Induce Defense Priming Against Bacteria in *Arabidopsis thaliana*. *Frontiers in Plant Science* **9**: 1221.
- Beekwilder J, van Leeuwen W, van Dam NM, Bertossi M, Grandi V, Mizzi L, Soloviev M, Szabados L, Molthoff JW, Schipper B, et al. 2008.** The impact of the absence of aliphatic glucosinolates on insect herbivory in *Arabidopsis*. *PloS one* **3**: e2068.
- Birkenbihl RP, Diezel C, Somssich IE. 2012.** *Arabidopsis* WRKY33 is a key transcriptional regulator of hormonal and metabolic responses toward *Botrytis cinerea* infection. *Plant Physiology* **159**: 266–285.
- Cao H, Glazebrook J, Clarke JD, Volko S, Dong X. 1997.** The *Arabidopsis* NPR1 gene that controls systemic acquired resistance encodes a novel protein containing ankyrin repeats. *Cell* **88**: 57–63.
- Frerigmann H, Gigolashvili T. 2014.** MYB34, MYB51, and MYB122 distinctly regulate indolic glucosinolate biosynthesis in *Arabidopsis thaliana*. *Molecular Plant* **7**: 814–828.
- Garcion C, Lohmann A, Lamodièrre E, Catinot J, Buchala A, Doermann P, Mettraux J-P. 2008.** Characterization and biological function of the ISOCHORISMATE SYNTHASE2 gene of *Arabidopsis*. *Plant Physiology* **147**: 1279–1287.
- Glazebrook J, Ausubel FM. 1994.** Isolation of phytoalexin-deficient mutants of *Arabidopsis thaliana* and characterization of their interactions with bacterial pathogens. *Proceedings of the National Academy of Sciences, USA* **91**: 8955–8959.
- Gouhier-Darimont C, Schmiesing A, Bonnet C, Lassueur S, Reymond P. 2013.** Signalling of *Arabidopsis thaliana* response to *Pieris brassicae* eggs shares similarities with PAMP-triggered immunity. *Journal of Experimental Botany* **64**: 665–674.
- Heck S, Grau T, Buchala A, Mettraux J-P, Nawrath C. 2003.** Genetic evidence that expression of NahG modifies defence pathways independent of salicylic acid biosynthesis in the *Arabidopsis*-*Pseudomonas syringae* pv. tomato interaction. *Plant Journal* **36**: 342–352.
- Liu Y, Sun T, Sun Y, Zhang Y, Radojic A, Huang X, Lan J, Chen S, Orduna AR, Zhang K, et al. 2020.** Diverse Roles of the Salicylic Acid Receptors NPR1 and NPR3/NPR4 in Plant Immunity. *Plant Cell* **32**: 4002–4016.
- Millet YA, Danna CH, Clay NK, Songnuan W, Simon MD, Werck-Reichhart D, Ausubel FM. 2010.** Innate immune responses activated in *Arabidopsis* roots by microbe-associated molecular patterns. *Plant Cell* **22**: 973–990.
- Mishina TE, Zeier J. 2006.** The *Arabidopsis* flavin-dependent monooxygenase FMO1 is an essential component of biologically induced systemic acquired resistance. *Plant Physiology* **141**: 1666–1675.



**Müller TM, Böttcher C, Glawischnig E. 2019.** Dissection of the network of indolic defence compounds in *Arabidopsis thaliana* by multiple mutant analysis. *Phytochemistry* **161**: 11–20.

**Müller TM, Böttcher C, Morbitzer R, Götz CC, Lehmann J, Lahaye T, Glawischnig E. 2015.** TRANSCRIPTION ACTIVATOR-LIKE EFFECTOR NUCLEASE-Mediated Generation and Metabolic Analysis of Camalexin-Deficient *cyp71a12 cyp71a13* Double Knockout Lines. *Plant Physiology* **168**: 849–858.

**Návarová H, Bernsdorff F, Döring A-C, Zeier J. 2012.** Pipecolic acid, an endogenous mediator of defense amplification and priming, is a critical regulator of inducible plant immunity. *Plant Cell* **24**: 5123–5141.

**Nawrath C, Métraux JP. 1999.** Salicylic acid induction-deficient mutants of *Arabidopsis* express PR-2 and PR-5 and accumulate high levels of camalexin after pathogen inoculation. *Plant Cell* **11**: 1393–1404.

**Rajniak J, Barco B, Clay NK, Sattely ES. 2015.** A new cyanogenic metabolite in *Arabidopsis* required for inducible pathogen defence. *Nature* **525**: 376–379.

**Windram O, Madhou P, McHattie S, Hill C, Hickman R, Cooke E, Jenkins DJ, Penfold CA, Baxter L, Breeze E, et al. 2012.** *Arabidopsis* defense against *Botrytis cinerea*: chronology and regulation deciphered by high-resolution temporal transcriptomic analysis. *Plant Cell* **24**: 3530–3557.

**Zhao Y, Hull AK, Gupta NR, Goss KA, Alonso JM, Ecker JR, Normanly J, Chory J, Celenza JL. 2002.** Trp-dependent auxin biosynthesis in *Arabidopsis*: involvement of cytochrome P450s CYP79B2 and CYP79B3. *Genes & Development* **16**: 3100–3112.
